# Supplementary material for: Rational design of molecular crystals for enhanced charge transfer properties
Source: Royal Society of Chemistry journal article supplement (doi:10.1039/c7tc04316c), 2017-01-01
Supplement: c7tc04316c1.pdf [file c7tc04316c1.pdf]

## Supporting information

# Rational Design of Molecular Crystals for Enhanced Charge Transfer Properties

Ying-Shi Guan<sup>a</sup>, Zhuolei Zhang<sup>a</sup>, Jinbo Pan<sup>b</sup>, Qimin Yan<sup>b</sup>, and Shenqiang Ren<sup>\*a</sup>

<sup>a</sup> Department of Mechanical, Engineering and Temple Materials Institute,  
Temple University Philadelphia, PA 19122, USA.

<sup>b</sup> Department of Physics, Temple University, Philadelphia, PA 19122, USA

## CONTENTS

1. SEM image and EDS element mapping of BTBT-TCNQ bilayer structure sample.
2. XRD patterns of BTBT-TCNQ and C<sub>10</sub>-BTBT-TCNQ bilayer structure.
3. UV-Vis absorption spectra of BTBT-TCNQ and C<sub>10</sub>-BTBT-TCNQ bilayer structure.
4. XRD pattern and UV-Vis spectrum of BTBT:TCNQ cocrystals.
5. The measured current density-voltage (I-V) curves for two bilayer samples and BTBT:TCNQ cocrystals.
6. The measured pyroelectric properties under external magnetic field with different intensity.

**1. SEM image and EDS element mapping of BTBT-TCNQ bilayer structure sample.**

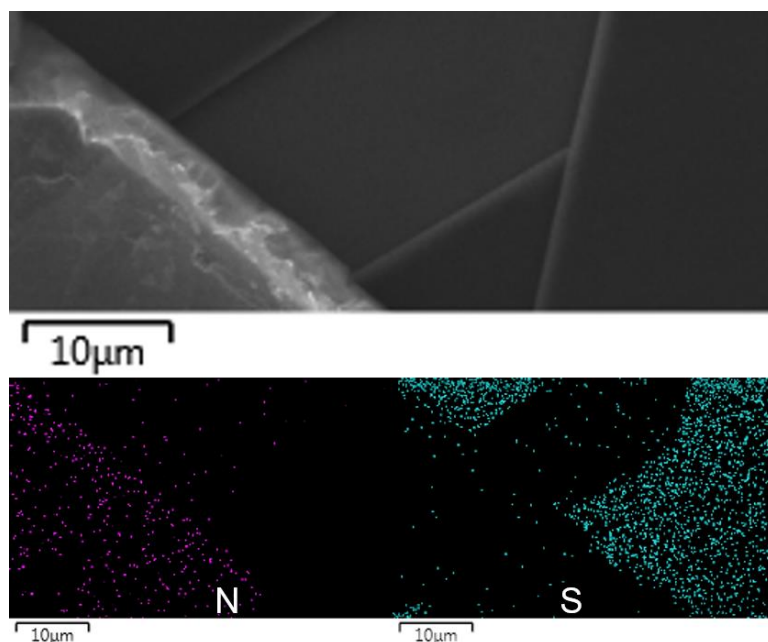

Figure S1 SEM image and EDS element map of BTBT-TCNQ sample, scale bar is 5μm.

**2. XRD patterns of BTBT-TCNQ and C<sub>10</sub>-BTBT-TCNQ bilayer structure.**

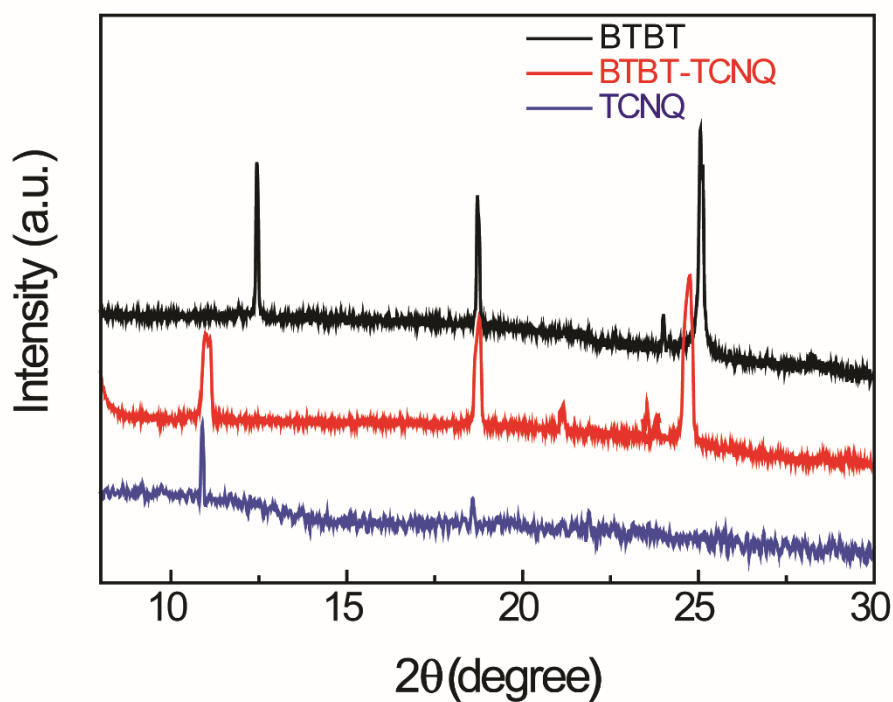

Figure S2 XRD patterns of BTBT, TCNQ and BTBT-TCNQ samples.

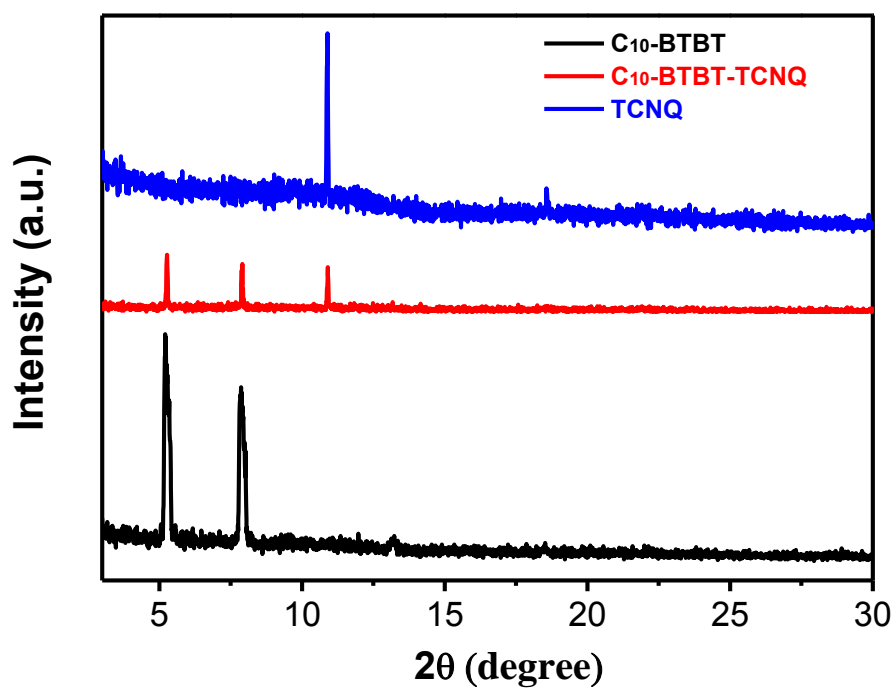

Figure S3 XRD patterns of  $C_{10}$ -BTBT, TCNQ and  $C_{10}$ -BTBT-TCNQ samples.

### 3. UV-Vis absorption spectra of BTBT-TCNQ and $C_{10}$ -BTBT-TCNQ bilayer structure.

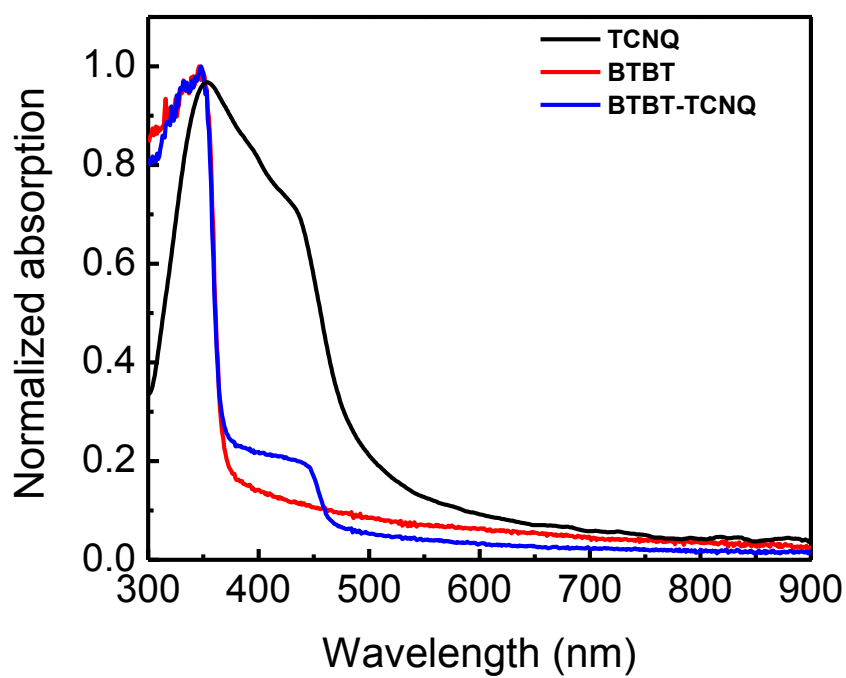

Figure S4. UV-Vis absorption of BTBT, TCNQ and BTBT-TCNQ samples.

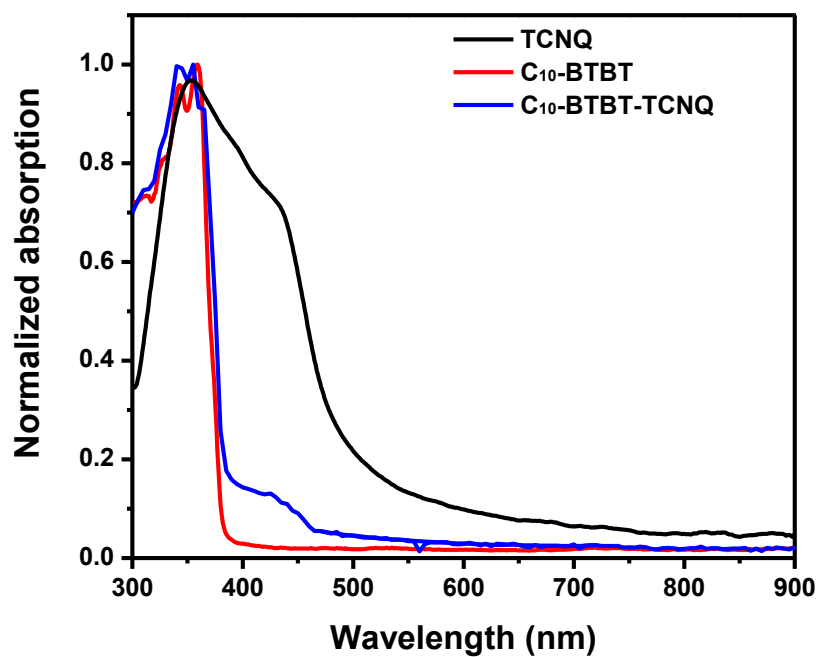

Figure S5 UV-Vis absorption of C<sub>10</sub>-BTBT, TCNQ and C<sub>10</sub>-BTBT-TCNQ samples.

4. XRD pattern and UV-Vis spectrum of BTBT:TCNQ cocrystals.

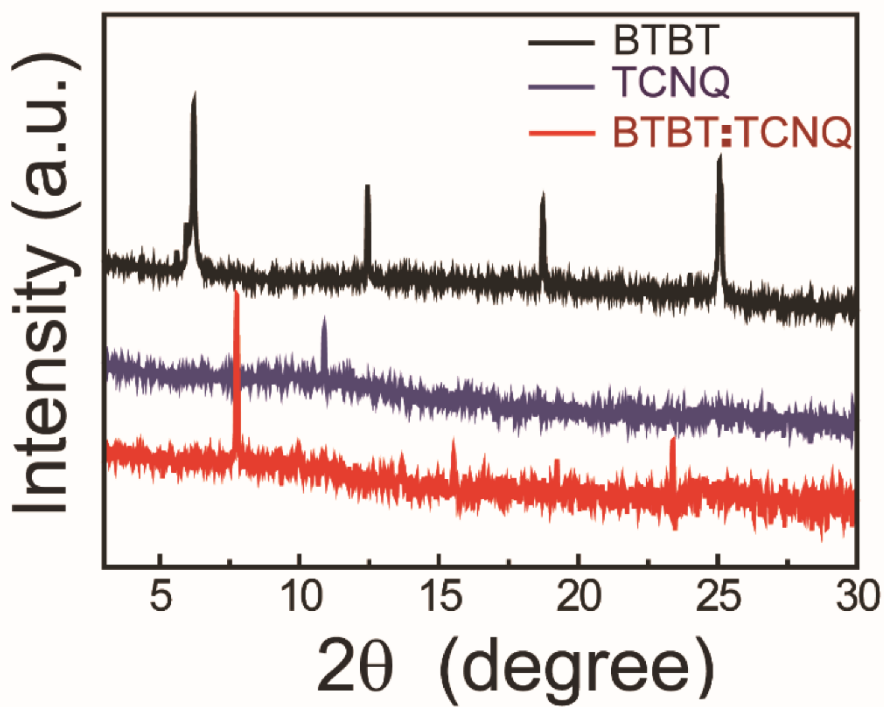

Figure S6 XRD pattern of BTBT:TCNQ cocrystals.

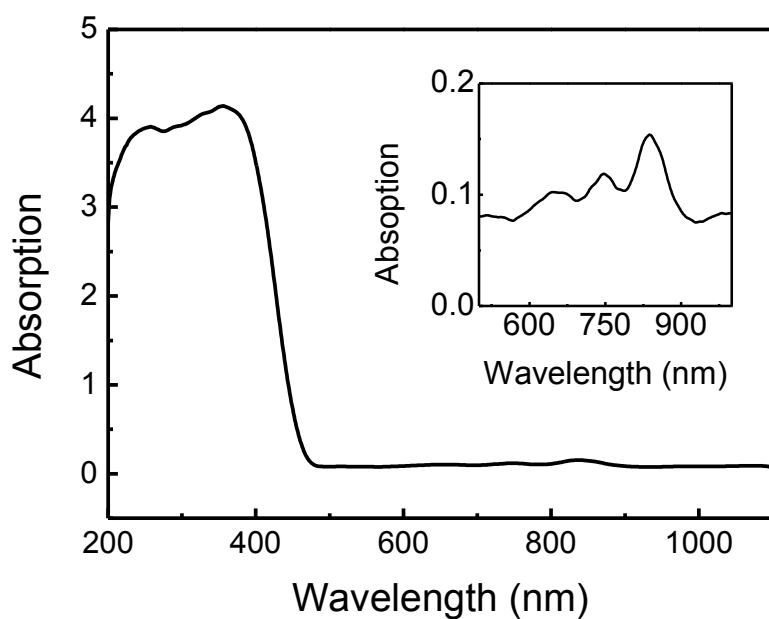

Figure S7 UV-Vis spectrum of BTBT:TCNQ cocrystals.

**5. The measured current density-voltage (I-V) curves for two bilayer samples and BTBT:TCNQ cocrystals.**

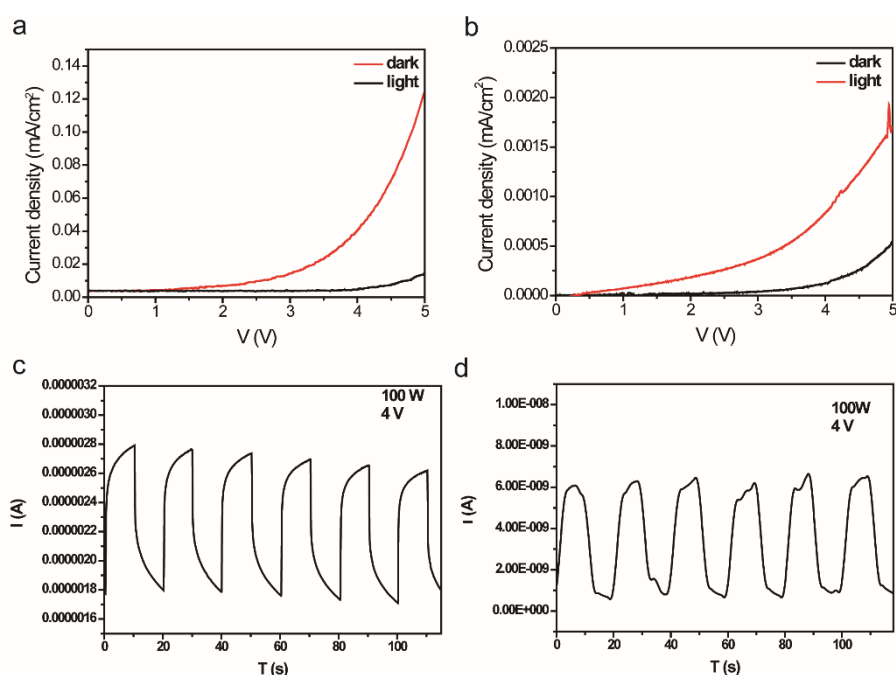

Figure S8 The measured current density-voltage (I-V) curves of (a, c) the BTBT-TCNQ bilayer and (b, d) C<sub>10</sub>-BTBT-TCNQ bilayer under dark and light illumination.

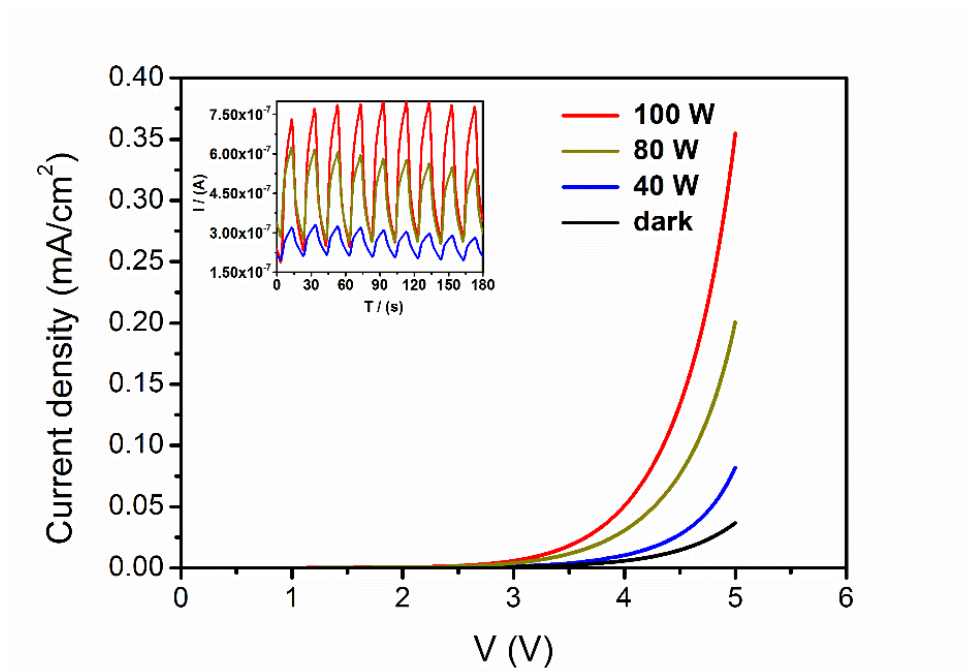

Figure S9 The measured current density-voltage (I-V) curves of the BTBT:TCNQ co-crystal under dark and light illumination.

6. The measured pyroelectric properties under external magnetic field with different intensity.

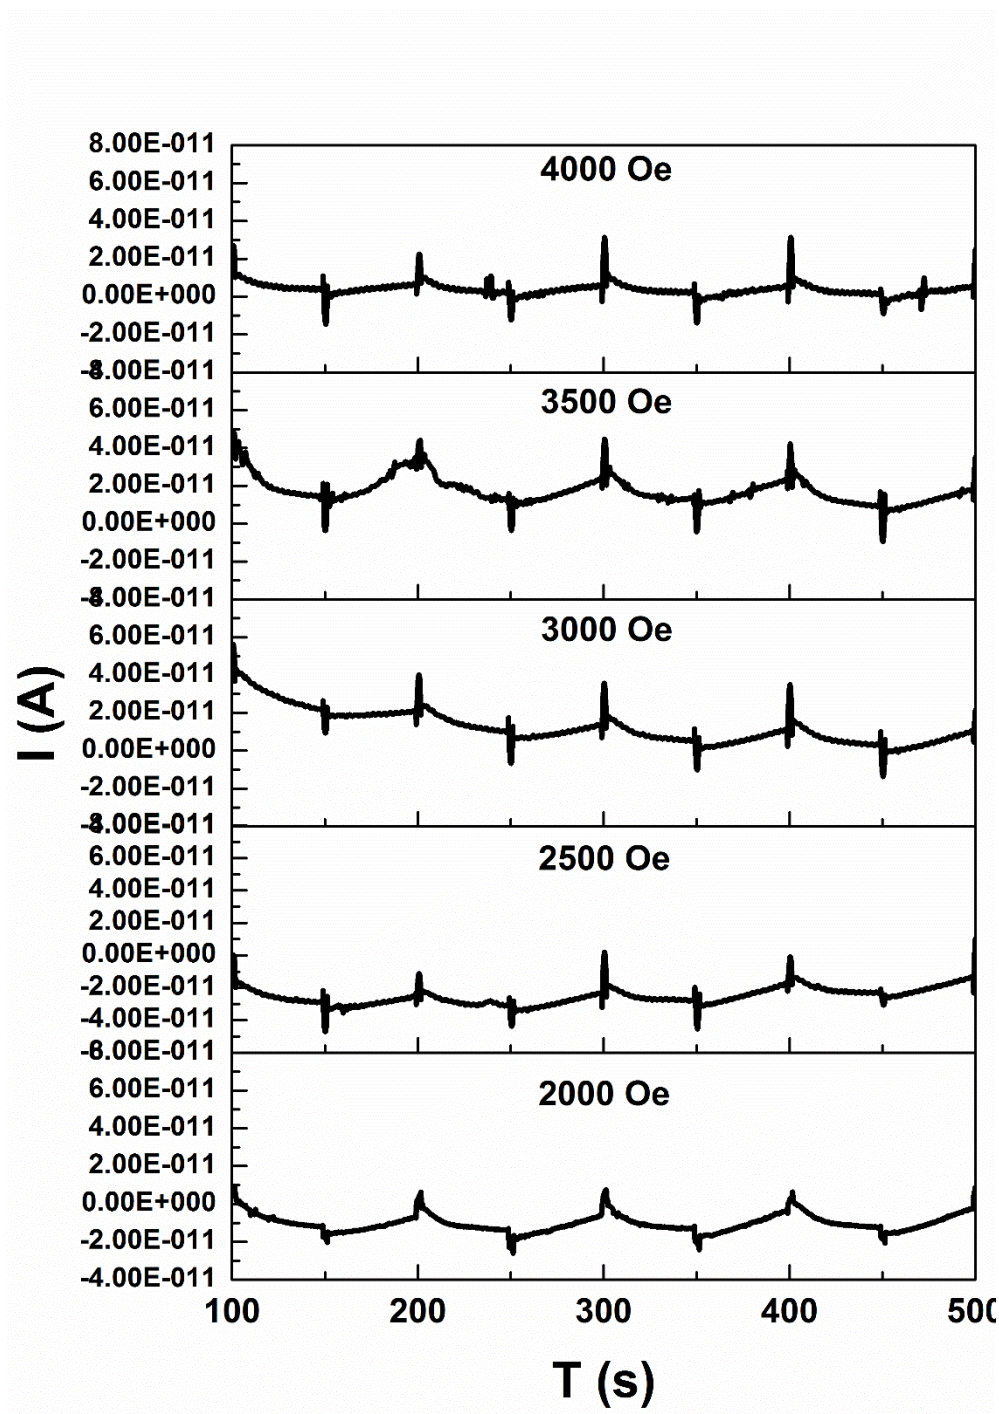

Figure S10 The measured pyroelectric current of the BTBT:TCNQ co-crystal under different intensity of external magnetic field.



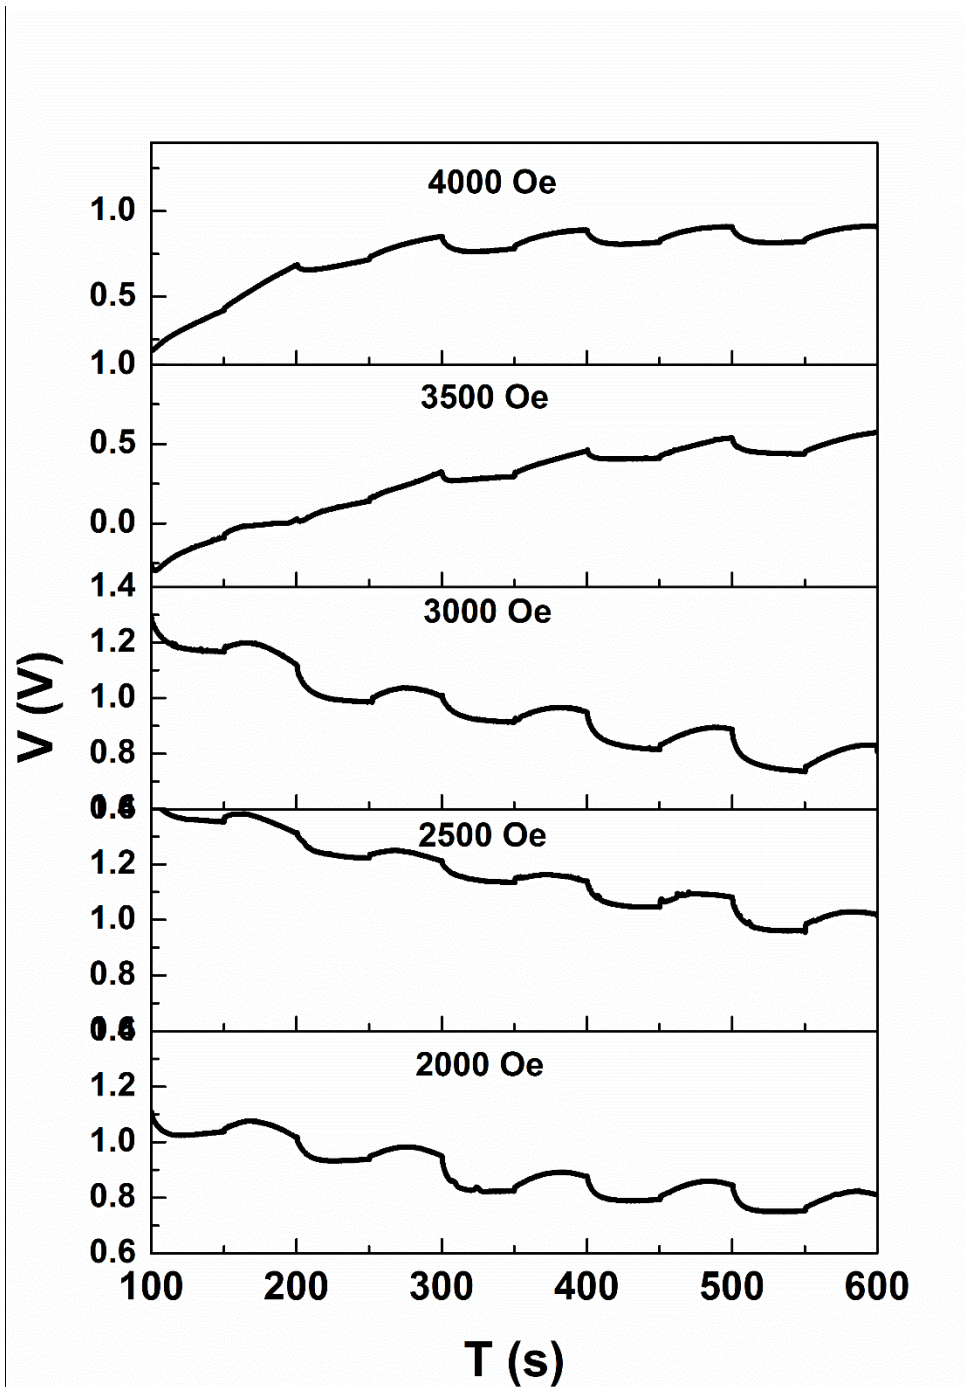

Figure S11 The measured pyroelectric voltage of the BTBT:TCNQ co-crystal under different intensity of external magnetic field.
